# Supplementary material for: One Year in the Extreme Isolation of Antarctica—Is This Enough to Modulate an “Allergic” Sensitization?
Source: MDPI journal article supplement (doi:10.3390/biomedicines10020448), 2022-02-15
Supplement: s1 [file s1]

**Table S1.** Example of an ALEX test result summary.

|                                                       |                                    |                    |                                  |                     |   |    |
|-------------------------------------------------------|------------------------------------|--------------------|----------------------------------|---------------------|---|----|
| Pollen                                                | Grass Pollen                       | 3                  | Cross-Reactive Allergen Families |                     |   |    |
|                                                       | Tree Pollen                        | 2                  | Polcalcin                        |                     | 0 |    |
|                                                       | Weed Pollen                        | 0                  | Profilin                         |                     | 2 |    |
| Mites                                                 | House Dust Mites and Storage Mites | 2                  | PR-10                            |                     | 2 |    |
| Microorganisms                                        | Fungal Spores and Yeast            | 0                  | Ole e 1 Family                   |                     | 2 |    |
| Plant-Based Food                                      | Legumes                            | 1                  | LTPs                             |                     | 0 |    |
|                                                       | Grain                              | 0                  | Storage Proteins                 |                     | 0 |    |
|                                                       | Spices                             | 0                  | Lipocalins                       |                     | 0 |    |
|                                                       | Fruits                             | 1                  | NPC2                             |                     | 0 |    |
|                                                       | Vegetables and mushrooms           | 0                  | Serum albumin                    |                     | 0 |    |
|                                                       | Nuts and Seeds                     | 1                  | Parvalbumin                      |                     | 0 |    |
| Animal-Derived Food                                   | Milk                               | 0                  | Tropomyosin                      |                     | 0 |    |
|                                                       | Egg                                | 0                  | CCD                              |                     | 0 |    |
|                                                       | Fish and Seafood                   | 0                  |                                  |                     |   |    |
|                                                       | Meat                               | 0                  |                                  |                     |   |    |
| Insects and Venoms                                    | Bee, Wasp                          | 0                  |                                  |                     |   |    |
|                                                       | Cockroach                          | 0                  |                                  |                     |   |    |
| Epithelial Tissues of Animals                         | Pets                               | 0                  |                                  |                     |   |    |
|                                                       | Animals                            | 0                  |                                  |                     |   |    |
| Others                                                | Latex                              | 2                  |                                  |                     |   |    |
|                                                       | Ficus an Hops                      | 0                  |                                  |                     |   |    |
|                                                       | CCD                                | 0                  |                                  |                     |   |    |
|                                                       |                                    |                    |                                  |                     |   |    |
| Total IgE (kU/L)                                      |                                    |                    |                                  |                     |   | 68 |
|                                                       |                                    |                    |                                  |                     |   |    |
| Highest measured IgE concentration per allergen group |                                    |                    |                                  |                     |   |    |
| 0                                                     | 1                                  | 2                  | 3                                | 4                   |   |    |
| <0.3 kUA/L                                            | 0.3–1 kUA/L                        | 1–5 kUA/L          | 5–15 kUA/L                       | >15 kUA/L           |   |    |
| Negative or uncertain                                 | Low IgE level                      | Moderate IgE level | High IgE level                   | Very high IgE level |   |    |

**Table S2.** *Specific IgEs in all overwinterers:* Due to no specific IgEs, the following categories were deleted to increase clarity: grain, spices, milk, egg, cockroach, animals, ficus, and hops, CCD; Deleted items for cross-reactive allergen families: polcalcin, storage proteins, parvalbumin, CCD. color explanation: no color/rose (0) = <0.3 kUA/L (negative or uncertain), yellow (1) = 0.3–1 kUA/L (low IgE level), orange (2) = 1–5 kUA/L (moderate IgE level), red (3) = 5–15 kUA/L (high IgE level), dark red (4) = >15 kUA/L (Very high IgE level). No color and rose lines show different subjects. Grey columns show separations of test clusters.

| Participant | Pollen       |             |      | Mites                            | Microorganisms        | Plant-Based Food |        |                        |              | Animal-Derived food |      | Insects & Venoms | Epithelial Tissues of Animals | Others | Cross-reactive Allergen Families |       |                |      |            |      |               |             |         |         | Total IgE                                                                                   | History of Allergy | Type of Allergy, symptoms and development |
|-------------|--------------|-------------|------|----------------------------------|-----------------------|------------------|--------|------------------------|--------------|---------------------|------|------------------|-------------------------------|--------|----------------------------------|-------|----------------|------|------------|------|---------------|-------------|---------|---------|---------------------------------------------------------------------------------------------|--------------------|-------------------------------------------|
|             | Grass Pollen | Tree Pollen | Weed | House Dust Mites & Storage Mites | Fungal Spores & Yeast | Legumes          | Fruits | Vegetables & mushrooms | Nuts & Seeds | Fish & Seafood      | Meat | Bee, Wasp        | Pets                          | Latex  | Profilin                         | PR-10 | Ole e 1 Family | LTPs | Lipocalins | NPC2 | Serum albumin | Tropomyosin | (kU/L)  |         |                                                                                             |                    |                                           |
| Con2_pre    | 3            | 0           | 1    | 3                                | 4                     | 0                | 0      | 0                      | 0            | 0                   | 0    | 0                | 1                             | 0      | 0                                | 0     | 1              | 0    | 0          | 3    | 0             | 0           | 94      | no      |                                                                                             |                    |                                           |
| Con2_Sept   | 3            | 0           | 0    | 3                                | 3                     | 0                | 0      | 0                      | 0            | 0                   | 0    | 0                | 0                             | 0      | 0                                | 0     | 0              | 0    | 0          | 3    | 0             | 0           | 179     |         |                                                                                             |                    |                                           |
| Con2_post   | 3            | 0           | 0    | 3                                | 3                     | 0                | 0      | 0                      | 0            | 0                   | 0    | 0                | 0                             | 0      | 0                                | 0     | 0              | 0    | 0          | 3    | 0             | 0           | 441     |         |                                                                                             |                    |                                           |
| Con3_pre    | 0            | 0           | 0    | 0                                | 0                     | 0                | 0      | 0                      | 0            | 0                   | 0    | 0                | 0                             | 0      | 0                                | 0     | 0              | 0    | 0          | 0    | 0             | 0           | 9       | no      |                                                                                             |                    |                                           |
| Con3_Sept   | 0            | 0           | 0    | 0                                | 0                     | 0                | 0      | 0                      | 0            | 0                   | 0    | 1                | 0                             | 0      | 0                                | 0     | 0              | 0    | 0          | 0    | 0             | 0           | 13      |         |                                                                                             |                    |                                           |
| Con3_post   | 0            | 0           | 0    | 0                                | 0                     | 0                | 0      | 0                      | 0            | 0                   | 0    | 0                | 0                             | 0      | 0                                | 0     | 0              | 0    | 0          | 0    | 0             | 0           | 8       |         |                                                                                             |                    |                                           |
| Con4_pre    | 4            | 3           | 0    | 2                                | 0                     | 1                | 0      | 1                      | 1            | 0                   | 0    | 2                | 0                             | 2      | 2                                | 3     | 2              | 0    | 0          | 0    | 0             | 0           | 223     | yes     | hay fever, reactions to insect bites, younger age allergy towards cats/dogs, food reactions |                    |                                           |
| Con4_Sept   | 4            | 2           | 0    | 2                                | 0                     | 1                | 0      | 1                      | 1            | 0                   | 0    | 1                | 0                             | 0      | 2                                | 2     | 2              | 0    | 0          | 0    | 0             | 0           | 324     |         |                                                                                             |                    |                                           |
| Con4_post   | 3            | 2           | 0    | 2                                | 0                     | 1                | 1      | 0                      | 1            | 0                   | 0    | 1                | 0                             | 2      | 2                                | 2     | 2              | 0    | 0          | 0    | 0             | 0           | 68      |         | afterwards, same reactions as before, but more hayfever                                     |                    |                                           |
| Con5_pre    | 0            | 0           | 0    | 0                                | 0                     | 0                | 0      | 0                      | 0            | 1                   | 0    | 1                | 0                             | 0      | 0                                | 0     | 0              | 0    | 0          | 0    | 0             | 0           | 20      | unknown |                                                                                             |                    |                                           |
| Con5_Sept   | 0            | 0           | 0    | 0                                | 0                     | 0                | 0      | 0                      | 0            | 2                   | 0    | 1                | 0                             | 0      | 0                                | 0     | 0              | 0    | 0          | 0    | 0             | 0           | 92      |         |                                                                                             |                    |                                           |
| Con5_post   | 0            | 0           | 0    | 0                                | 0                     | 0                | 0      | 0                      | 0            | 1                   | 0    | 0                | 0                             | 0      | 0                                | 0     | 0              | 0    | 0          | 0    | 0             | 0           | 13      |         |                                                                                             |                    |                                           |
| Con6_pre    | 2            | 0           | 0    | 0                                | 0                     | 0                | 0      | 0                      | 0            | 0                   | 0    | 0                | 0                             | 0      | 0                                | 0     | 0              | 0    | 0          | 0    | 0             | 0           | 16      | no      |                                                                                             |                    |                                           |
| Con6_Sept   | 2            | 0           | 0    | 0                                | 0                     | 0                | 0      | 0                      | 0            | 0                   | 0    | 0                | 0                             | 0      | 0                                | 0     | 0              | 0    | 0          | 0    | 0             | 0           | 80      |         |                                                                                             |                    |                                           |
| Con6_post   | 2            | 0           | 0    | 0                                | 0                     | 0                | 0      | 0                      | 0            | 0                   | 0    | 0                | 0                             | 0      | 0                                | 0     | 0              | 0    | 0          | 0    | 0             | 0           | 15      |         |                                                                                             |                    |                                           |
| Con8_pre    | 4            | 0           | 2    | 2                                | 0                     | 0                | 0      | 0                      | 0            | 0                   | 0    | 1                | 0                             | 0      | 0                                | 0     | 0              | 0    | 0          | 0    | 0             | 0           | 294     | unknown |                                                                                             |                    |                                           |
| Con8_Sept   | 4            | 0           | 2    | 0                                | 0                     | 0                | 0      | 0                      | 0            | 0                   | 0    | 2                | 0                             | 0      | 0                                | 0     | 0              | 0    | 0          | 0    | 0             | 0           | 525     |         |                                                                                             |                    |                                           |
| Con8_post   | missing      |             |      |                                  |                       |                  |        |                        |              |                     |      |                  |                               |        |                                  |       |                |      |            |      |               |             | missing |         |                                                                                             |                    |                                           |

|            |         |   |   |   |   |   |   |   |   |   |   |   |   |   |   |   |   |   |   |   |   |   |   |         |                |                                                                                 |
|------------|---------|---|---|---|---|---|---|---|---|---|---|---|---|---|---|---|---|---|---|---|---|---|---|---------|----------------|---------------------------------------------------------------------------------|
| Con9_pre   | 2       | 1 | 1 | 0 | 0 | 0 | 0 | 0 | 0 | 0 | 0 | 0 | 0 | 0 | 0 | 0 | 1 | 0 | 0 | 0 | 0 | 0 | 0 | 193     | yes            | hay fever (pollen from olive trees)                                             |
| Con9_Sept  | 2       | 0 | 1 | 0 | 0 | 0 | 0 | 0 | 0 | 0 | 0 | 0 | 0 | 0 | 0 | 0 | 0 | 0 | 0 | 0 | 0 | 0 | 0 | 124     |                |                                                                                 |
| Con9_post  | 2       | 2 | 0 | 0 | 0 | 0 | 0 | 0 | 0 | 0 | 0 | 0 | 0 | 0 | 0 | 0 | 2 | 0 | 0 | 0 | 0 | 0 | 0 | 63      |                | no hay fever after return                                                       |
| Con10_pre  | 0       | 0 | 0 | 0 | 0 | 0 | 0 | 0 | 0 | 0 | 1 | 0 | 0 | 0 | 0 | 0 | 0 | 0 | 0 | 0 | 0 | 0 | 0 | 36      | unknown        |                                                                                 |
| Con10_Sept | 0       | 0 | 0 | 0 | 0 | 0 | 0 | 0 | 0 | 0 | 0 | 0 | 0 | 0 | 0 | 0 | 0 | 0 | 0 | 0 | 0 | 0 | 0 | 108     |                |                                                                                 |
| Con10_post | 0       | 0 | 0 | 0 | 0 | 0 | 0 | 0 | 0 | 0 | 0 | 0 | 0 | 0 | 0 | 0 | 0 | 0 | 0 | 0 | 0 | 0 | 0 | 20      |                |                                                                                 |
| Con13_pre  | 3       | 3 | 2 | 4 | 2 | 3 | 3 | 1 | 2 | 0 | 1 | 0 | 0 | 0 | 0 | 0 | 0 | 3 | 0 | 4 | 0 | 0 | 0 | 110     | unknown        |                                                                                 |
| Con13_Sept | 3       | 3 | 1 | 4 | 2 | 3 | 3 | 1 | 1 | 0 | 0 | 0 | 0 | 0 | 0 | 0 | 0 | 3 | 0 | 4 | 0 | 0 | 0 | 240     |                |                                                                                 |
| Con13_post | 2       | 3 | 2 | 4 | 2 | 3 | 3 | 1 | 1 | 0 | 0 | 0 | 0 | 0 | 0 | 0 | 0 | 3 | 0 | 4 | 0 | 0 | 0 | 99      |                |                                                                                 |
| Con14_pre  | 0       | 3 | 0 | 4 | 0 | 0 | 0 | 0 | 0 | 1 | 0 | 2 | 0 | 0 | 0 | 2 | 0 | 0 | 0 | 4 | 0 | 1 | 0 | 405     | unknown        |                                                                                 |
| Con14_Sept | 0       | 3 | 0 | 4 | 0 | 0 | 0 | 0 | 0 | 1 | 0 | 1 | 0 | 0 | 0 | 2 | 0 | 0 | 0 | 4 | 0 | 1 | 0 | 1335    |                |                                                                                 |
| Con14_post | 0       | 3 | 0 | 4 | 0 | 0 | 1 | 0 | 0 | 0 | 1 | 2 | 0 | 0 | 0 | 2 | 0 | 0 | 0 | 4 | 0 | 0 | 0 | 618     |                |                                                                                 |
| Con15_pre  | 0       | 0 | 0 | 2 | 0 | 0 | 0 | 0 | 0 | 0 | 0 | 0 | 0 | 0 | 0 | 0 | 0 | 0 | 0 | 2 | 0 | 0 | 0 | 6       | yes            | hay fever (varying with years), dust mites                                      |
| Con15_Sept | 0       | 0 | 0 | 2 | 0 | 0 | 0 | 0 | 0 | 0 | 0 | 0 | 0 | 0 | 0 | 0 | 0 | 0 | 0 | 2 | 0 | 0 | 0 | 4       |                |                                                                                 |
| Con15_post | 0       | 0 | 0 | 2 | 0 | 0 | 0 | 0 | 0 | 0 | 0 | 0 | 0 | 0 | 0 | 0 | 0 | 0 | 0 | 2 | 0 | 0 | 0 | 5       |                | worse hay fever after return                                                    |
| Con17_pre  | 0       | 0 | 0 | 0 | 0 | 0 | 0 | 0 | 0 | 0 | 0 | 1 | 0 | 0 | 0 | 0 | 0 | 0 | 0 | 0 | 0 | 0 | 0 | 34      | no             |                                                                                 |
| Con17_Sept | 0       | 0 | 0 | 0 | 0 | 0 | 0 | 0 | 0 | 0 | 0 | 0 | 0 | 0 | 0 | 0 | 0 | 0 | 0 | 0 | 0 | 0 | 0 | 51      |                |                                                                                 |
| Con17_post | 0       | 0 | 0 | 0 | 0 | 0 | 0 | 0 | 0 | 0 | 0 | 0 | 0 | 0 | 0 | 0 | 0 | 0 | 0 | 0 | 0 | 0 | 0 | 33      |                |                                                                                 |
| Con21_pre  | 2       | 0 | 0 | 0 | 0 | 0 | 0 | 0 | 0 | 0 | 0 | 0 | 1 | 0 | 0 | 0 | 0 | 0 | 0 | 0 | 0 | 0 | 0 | 26      | yes afterwards |                                                                                 |
| Con21_Sept | 1       | 0 | 0 | 0 | 0 | 0 | 0 | 0 | 0 | 0 | 0 | 0 | 1 | 0 | 0 | 0 | 0 | 0 | 0 | 0 | 0 | 0 | 0 | 31      |                |                                                                                 |
| Con21_post | 1       | 2 | 0 | 0 | 0 | 0 | 0 | 0 | 0 | 0 | 1 | 0 | 3 | 0 | 0 | 0 | 2 | 0 | 2 | 0 | 3 | 0 | 0 | 176     |                | newly experienced hay fever directly after return for a couple of days          |
| Con23_pre  | 1       | 2 | 2 | 0 | 0 | 0 | 0 | 0 | 0 | 0 | 2 | 0 | 4 | 0 | 0 | 1 | 2 | 0 | 2 | 0 | 4 | 0 | 0 | 719     | yes            | cats, dogs, rats -> wheezing                                                    |
| Con23_Sept | missing |   |   |   |   |   |   |   |   |   |   |   |   |   |   |   |   |   |   |   |   |   |   | missing |                |                                                                                 |
| Con23_post | 1       | 2 | 0 | 0 | 0 | 0 | 0 | 0 | 0 | 0 | 0 | 0 | 3 | 0 | 0 | 0 | 2 | 0 | 2 | 0 | 3 | 0 | 0 | 521     |                | new allergic reactions to grass/flowers -> hay fever, wheezing, throat swelling |
| Neu1_pre   | 0       | 3 | 1 | 0 | 0 | 0 | 2 | 0 | 1 | 0 | 0 | 2 | 0 | 0 | 0 | 3 | 0 | 2 | 0 | 0 | 0 | 0 | 0 | 83      | unknown        |                                                                                 |

|            |   |   |   |   |   |   |   |   |   |   |   |   |   |   |  |   |   |   |   |   |   |   |   |     |         |                          |  |
|------------|---|---|---|---|---|---|---|---|---|---|---|---|---|---|--|---|---|---|---|---|---|---|---|-----|---------|--------------------------|--|
| Neu1_Sept  | 0 | 2 | 0 | 0 | 0 | 0 | 2 | 0 | 1 | 0 | 0 | 2 | 0 | 0 |  | 0 | 2 | 0 | 2 | 0 | 0 | 0 | 0 | 0   | 67      |                          |  |
| Neu1_post  | 0 | 2 | 0 | 0 | 0 | 0 | 1 | 0 | 1 | 0 | 0 | 1 | 0 | 0 |  | 0 | 2 | 0 | 1 | 0 | 0 | 0 | 0 | 34  |         |                          |  |
| Neu2_pre   | 0 | 0 | 0 | 0 | 0 | 0 | 0 | 0 | 0 | 0 | 0 | 1 | 0 | 0 |  | 0 | 0 | 0 | 0 | 0 | 0 | 0 | 0 | 30  | unknown |                          |  |
| Neu2_Sept  | 1 | 0 | 0 | 0 | 0 | 0 | 0 | 0 | 0 | 0 | 0 | 2 | 0 | 0 |  | 0 | 0 | 0 | 0 | 0 | 0 | 0 | 0 | 138 |         |                          |  |
| Neu2_post  | 0 | 0 | 0 | 0 | 0 | 0 | 0 | 0 | 0 | 0 | 0 | 1 | 0 | 0 |  | 0 | 0 | 0 | 0 | 0 | 0 | 0 | 0 | 13  |         |                          |  |
| Neu3_pre   | 0 | 0 | 0 | 0 | 0 | 0 | 0 | 0 | 0 | 0 | 0 | 2 | 0 | 0 |  | 0 | 0 | 0 | 0 | 0 | 0 | 0 | 0 | 5   | unknown |                          |  |
| Neu3_Sept  | 0 | 0 | 0 | 0 | 0 | 0 | 0 | 0 | 0 | 0 | 0 | 1 | 0 | 0 |  | 0 | 0 | 0 | 0 | 0 | 0 | 0 | 0 | 4   |         |                          |  |
| Neu3_post  | 0 | 0 | 0 | 0 | 0 | 0 | 0 | 0 | 0 | 0 | 0 | 0 | 0 | 0 |  | 0 | 0 | 0 | 0 | 0 | 0 | 0 | 0 | 4   |         |                          |  |
| Neu4_pre   | 0 | 2 | 0 | 0 | 0 | 0 | 0 | 0 | 1 | 0 | 0 | 0 | 1 | 0 |  | 0 | 2 | 0 | 0 | 0 | 0 | 0 | 0 | 41  | yes     | grass and rabbit allergy |  |
| Neu4_Sept  | 0 | 2 | 0 | 0 | 0 | 0 | 0 | 0 | 0 | 0 | 0 | 0 | 1 | 0 |  | 0 | 2 | 0 | 0 | 0 | 0 | 0 | 0 | 45  |         |                          |  |
| Neu4_post  | 0 | 2 | 0 | 0 | 0 | 0 | 0 | 0 | 0 | 0 | 0 | 0 | 1 | 0 |  | 0 | 2 | 0 | 0 | 0 | 0 | 0 | 0 | 15  |         |                          |  |
| Neu5_pre   | 4 | 3 | 0 | 0 | 0 | 0 | 0 | 0 | 1 | 0 | 0 | 0 | 0 | 0 |  | 2 | 3 | 0 | 0 | 0 | 0 | 0 | 0 | 523 | unknown |                          |  |
| Neu5_Sept  | 4 | 2 | 0 | 0 | 0 | 0 | 1 | 0 | 0 | 0 | 0 | 1 | 0 | 0 |  | 1 | 2 | 0 | 0 | 0 | 0 | 0 | 0 | 368 |         |                          |  |
| Neu5_post  | 4 | 2 | 0 | 0 | 0 | 0 | 0 | 0 | 0 | 0 | 0 | 1 | 0 | 0 |  | 0 | 2 | 0 | 0 | 0 | 0 | 0 | 0 | 61  |         |                          |  |
| Neu6_pre   | 0 | 0 | 0 | 0 | 0 | 0 | 0 | 0 | 0 | 2 | 0 | 0 | 0 | 0 |  | 0 | 0 | 0 | 0 | 0 | 0 | 0 | 0 | 15  | no      |                          |  |
| Neu6_Sept  | 0 | 0 | 0 | 0 | 0 | 0 | 1 | 0 | 0 | 2 | 0 | 1 | 0 | 0 |  | 0 | 0 | 0 | 0 | 0 | 0 | 0 | 0 | 11  |         |                          |  |
| Neu6_post  | 0 | 0 | 0 | 0 | 0 | 0 | 0 | 0 | 0 | 2 | 0 | 0 | 0 | 0 |  | 0 | 0 | 0 | 0 | 0 | 0 | 0 | 0 | 7   |         |                          |  |
| Neu8_pre   | 0 | 0 | 0 | 0 | 0 | 0 | 0 | 0 | 0 | 2 | 0 | 0 | 0 | 0 |  | 0 | 0 | 0 | 0 | 0 | 0 | 0 | 0 | 6   | unknown |                          |  |
| Neu8_Sept  | 0 | 0 | 0 | 0 | 0 | 0 | 0 | 0 | 0 | 1 | 0 | 0 | 0 | 0 |  | 0 | 0 | 0 | 0 | 0 | 0 | 0 | 0 | 11  |         |                          |  |
| Neu8_post  | 0 | 0 | 0 | 0 | 0 | 0 | 0 | 0 | 0 | 3 | 0 | 0 | 1 | 0 |  | 0 | 0 | 0 | 0 | 0 | 0 | 0 | 0 | 8   |         |                          |  |
| Neu10_pre  | 2 | 0 | 0 | 0 | 0 | 0 | 0 | 0 | 0 | 0 | 0 | 0 | 0 | 0 |  | 0 | 0 | 0 | 0 | 0 | 0 | 0 | 0 | 9   | unknown |                          |  |
| Neu10_Sept | 1 | 0 | 0 | 0 | 0 | 0 | 0 | 0 | 0 | 0 | 0 | 0 | 0 | 0 |  | 0 | 0 | 0 | 0 | 0 | 0 | 0 | 0 | 23  |         |                          |  |
| Neu10_post | 0 | 0 | 0 | 0 | 0 | 0 | 0 | 0 | 0 | 0 | 0 | 0 | 0 | 0 |  | 0 | 0 | 0 | 0 | 0 | 0 | 0 | 0 | 11  |         |                          |  |
| Neu11_pre  | 0 | 0 | 0 | 3 | 0 | 0 | 0 | 0 | 0 | 2 | 0 | 1 | 2 | 0 |  | 0 | 0 | 0 | 0 | 0 | 3 | 0 | 0 | 290 | unknown |                          |  |
| Neu11_Sept | 0 | 0 | 0 | 3 | 0 | 0 | 0 | 0 | 0 | 0 | 0 | 0 | 1 | 0 |  | 0 | 0 | 0 | 0 | 0 | 3 | 0 | 0 | 458 |         |                          |  |
| Neu11_post | 0 | 1 | 0 | 2 | 0 | 0 | 0 | 0 | 0 | 1 | 0 | 0 | 2 | 0 |  | 0 | 1 | 0 | 0 | 0 | 2 | 0 | 0 | 130 |         |                          |  |

|            |   |   |   |   |   |   |   |   |   |   |   |   |   |   |  |   |   |   |   |   |   |   |   |  |    |  |         |  |
|------------|---|---|---|---|---|---|---|---|---|---|---|---|---|---|--|---|---|---|---|---|---|---|---|--|----|--|---------|--|
| Neu12_pre  | 1 | 3 | 0 | 3 | 0 | 2 | 0 | 1 | 0 | 0 | 0 | 0 | 2 | 0 |  | 0 | 3 | 0 | 0 | 0 | 3 | 0 | 0 |  | 17 |  | unknown |  |
| Neu12_Sept | 1 | 3 | 0 | 3 | 0 | 2 | 0 | 0 | 0 | 0 | 0 | 0 | 2 | 0 |  | 0 | 3 | 0 | 0 | 0 | 3 | 0 | 0 |  | 41 |  |         |  |
| Neu12_post | 0 | 3 | 0 | 3 | 0 | 3 | 0 | 1 | 0 | 0 | 0 | 0 | 1 | 0 |  | 0 | 3 | 0 | 0 | 0 | 3 | 0 | 0 |  | 12 |  |         |  |
| Neu13_pre  | 3 | 2 | 0 | 2 | 0 | 0 | 0 | 0 | 0 | 0 | 0 | 0 | 0 | 0 |  | 0 | 1 | 2 | 0 | 0 | 2 | 0 | 0 |  | 8  |  | unknown |  |
| Neu13_Sept | 2 | 2 | 0 | 3 | 0 | 0 | 0 | 0 | 0 | 0 | 0 | 0 | 0 | 0 |  | 0 | 0 | 1 | 0 | 0 | 3 | 0 | 0 |  | 13 |  |         |  |
| Neu13_post | 2 | 2 | 0 | 2 | 0 | 0 | 0 | 0 | 0 | 0 | 0 | 0 | 0 | 0 |  | 0 | 1 | 0 | 0 | 0 | 2 | 0 | 0 |  | 7  |  |         |  |
| Neu16_pre  | 0 | 0 | 0 | 4 | 3 | 0 | 0 | 0 | 0 | 0 | 0 | 0 | 0 | 0 |  | 0 | 0 | 0 | 0 | 0 | 4 | 0 | 0 |  | 42 |  | unknown |  |
| Neu16_Sept | 0 | 0 | 0 | 4 | 2 | 0 | 0 | 0 | 0 | 2 | 0 | 0 | 0 | 0 |  | 0 | 0 | 0 | 0 | 0 | 4 | 0 | 0 |  | 30 |  |         |  |
| Neu16_post | 0 | 0 | 0 | 3 | 2 | 0 | 0 | 0 | 0 | 0 | 0 | 0 | 0 | 0 |  | 0 | 0 | 0 | 0 | 0 | 3 | 0 | 0 |  | 10 |  |         |  |
